# **The Calcineurin-FoxO-MuRF1 Signaling Pathway Regulates Myofibril Integrity in Cardiomyocytes**

Hirohito Shimizu<sup>1</sup>, Adam Langenbacher<sup>1</sup>, Jie Huang<sup>1</sup>, Kevin Wang<sup>1</sup>, Georg W. Otto<sup>2</sup>, Robert Geisler<sup>3</sup>, Yibin Wang<sup>4</sup> and Jau-Nian Chen<sup>1</sup>

<sup>1</sup>Department of Molecular, Cell and Developmental Biology, University of California, Los Angeles, USA;

<sup>2</sup>Genetics and Genomic Medicine, UCL Institute of Child Health, United Kingdom; <sup>3</sup>Institute of Toxicology and Genetics, Karlsruhe Institute of Technology (KIT), Germany, <sup>4</sup>Department of Anesthesiology and Department of Medicine and Physiology, David Geffen School of Medicine, University of California, Los Angeles, USA

Correspondence should be addressed to JNC ([chenjn@mcd.db.ucla.edu](mailto:chenjn@mcd.db.ucla.edu))

# 1    **Abstract**

2    Altered Ca<sup>2+</sup> handling is often present in diseased hearts undergoing structural remodeling and functional  
3    deterioration. The influences of Ca<sup>2+</sup> signaling on cardiac function have been examined extensively, but  
4    whether Ca<sup>2+</sup> directly regulates sarcomere structure has remained elusive. Using a mutant zebrafish model  
5    lacking *NCX1* activity in the heart, we explored the impacts of impaired Ca<sup>2+</sup> homeostasis on myofibril  
6    integrity. Gene expression profiling analysis revealed that the E3 ubiquitin ligase MuRF1 is upregulated  
7    in *ncx1*-deficient hearts. Intriguingly, knocking down MuRF1 activity or inhibiting proteasome activity  
8    preserved myofibril integrity in *ncx1* deficient hearts, revealing a MuRF1-mediated proteasome  
9    degradation mechanism that is activated in response to abnormal Ca<sup>2+</sup> homeostasis. Furthermore, we  
10    detected an accumulation of the MuRF1 regulator FoxO in the nuclei of *ncx1*-deficient cardiomyocytes.  
11    Overexpression of FoxO in wild type cardiomyocytes induced MuRF1 expression and caused myofibril  
12    disarray, whereas inhibiting Calcineurin activity attenuated FoxO-mediated MuRF1 expression and  
13    protected sarcomeres from degradation in *ncx1*-deficient hearts. Together, our findings reveal a novel  
14    mechanism by which Ca<sup>2+</sup> overload disrupts the myofibril integrity in heart muscle cells by activating a  
15    Calcineurin-FoxO-MuRF1-proteasome signaling pathway.

## 16 **Introduction**

17           The establishment and maintenance of rhythmic cardiac contractions require tightly regulated  $\text{Ca}^{2+}$   
 18 signaling and intact contractile machinery. In the heart, a small amount of  $\text{Ca}^{2+}$  enters cardiomyocytes  
 19 upon stimulation by an action potential. This  $\text{Ca}^{2+}$  influx induces the release of a larger amount of  $\text{Ca}^{2+}$   
 20 from the sarcoplasmic reticulum (SR) resulting in an abrupt increase in cytosolic  $\text{Ca}^{2+}$  levels and muscle  
 21 contraction. The re-sequestering of  $\text{Ca}^{2+}$  to the SR by SERCA2 and extrusion of  $\text{Ca}^{2+}$  from the cell by  
 22 NCX1 allows the muscle to relax (Bers, 2002). Abnormal  $\text{Ca}^{2+}$  handling has been associated with cardiac  
 23 diseases including heart failure and arrhythmia in humans and animal models (Luo and Anderson, 2013)  
 24 and defective myofibril structures are also often observed in diseased hearts (Lopes and Elliott, 2014).  
 25 However, whether or not there is a causal relationship between abnormal  $\text{Ca}^{2+}$  handling and myofibril  
 26 disarray in diseased myocytes has not yet been established.

27  
 28           The RING finger protein MuRF1 (also known as TRIM63) is a muscle-specific E3 ubiquitin  
 29 protein ligase involved in the regulation of muscle turnover in normal physiology and under pathological  
 30 conditions. MuRF1 acts on several sarcomeric target proteins, tagging them with polyubiquitin chains for  
 31 proteasome-dependent degradation (Kedar et al., 2004; Clarke et al., 2007; Cohen et al., 2009; Mearini et  
 32 al., 2010). Through this mechanism, MuRF1 regulates normal sarcomere protein turnover and removes  
 33 misfolded and/or damaged proteins in skeletal and cardiac muscles (Lyon et al., 2013; Pagan et al., 2013;  
 34 Willis et al., 2014). MuRF1 expression is elevated under muscle catabolic conditions and overexpression  
 35 of MuRF1 in the heart results in a thin ventricular wall and a rapid transition to heart failure upon  
 36 transaortic constriction, suggesting that MuRF1 is a major player in muscle catabolic processes (Bodine et  
 37 al., 2001; Labeit et al., 2010; Baehr et al., 2011; Files et al., 2012; Gomes et al., 2012; Bodine and Baehr,  
 38 2014). Conversely, knockout of MuRF1 promotes resistance to muscle atrophy and an exaggerated  
 39 hypertrophic response to pressure overload (Willis et al., 2007; Willis et al., 2009a; Willis et al., 2009b).  
 40 In humans, patients with specific MuRF1 gene variants develop hypertrophic cardiomyopathy at a

younger age (Chen et al., 2012; Su et al., 2014), revealing a pathological role for MuRF1 in the progression of cardiac diseases.

In skeletal muscles, the Forkhead box O (FoxO) transcription factors serves as a nodal point controlling muscle degradation via regulating MuRF1 expression. Under catabolic conditions, the PI3K-Akt pathway is suppressed and hypophosphorylated FoxO translocates into the nucleus causing MuRF1 induction and muscle atrophy (Lecker et al., 2004; Waddell et al., 2008). Conversely, upon IGF stimulation, AKT is activated to phosphorylate and sequester FoxO in the cytoplasm, resulting in the repression of MuRF1 and an increase in myocyte mass (Sacheck et al., 2004; Stitt et al., 2004). Similarly, an AKT-FoxO-mediated suppression of MuRF1 expression in response to insulin has been noted in cardiac muscles (Skurk et al., 2005; Paula-Gomes et al., 2013).

In this study, we used the zebrafish *tremblor/ncx1h* mutant to explore the regulatory relationship between  $Ca^{2+}$  homeostasis and the maintenance of cardiac muscle integrity. We have previously shown that *NCX1h* (also known as *slc8a1a*) encodes a cardiac specific sodium-calcium exchanger 1 (NCX1) in zebrafish and that the *tremblor* mutant lacks functional NCX1h (Langenbacher et al., 2005). NCX1 is a primary  $Ca^{2+}$  efflux mechanism in cardiomyocytes (Ottolia et al., 2013), and consistent with this important role in  $Ca^{2+}$  homeostasis, cyclic  $Ca^{2+}$  transients are abolished in *tremblor/ncx1h* cardiomyocytes resulting in fibrillation-like chaotic cardiac contractions (Ebert et al., 2005; Langenbacher et al., 2005; Shimizu et al., 2015). Like NCX1<sup>-/-</sup> mice, *tremblor/ncx1h* zebrafish hearts also develop severe myofibril disarray (Koushik et al., 2001; Wakimoto et al., 2003; Ebert et al., 2005), suggesting that a conserved molecular link exists between aberrant  $Ca^{2+}$  handling and myofibril disarray. From a microarray analysis, we found that the expression of MuRF1 is significantly upregulated in *ncx1h*-deficient hearts. This MuRF1 upregulation was responsible for the myofibril disarray in *ncx1h*-deficient hearts, and normal cardiac myofibrils could be restored by genetic and pharmacological manipulation of MuRF1 or



66 proteasome activity. We also found that elevated intracellular  $\text{Ca}^{2+}$  levels enhanced MuRF1 expression via  
67 activation of Calcineurin signaling, which dephosphorylates the MuRF1 transcriptional regulator FoxO,  
68 leading to its nuclear translocation. Our findings reveal a novel signaling pathway in which  $\text{Ca}^{2+}$   
69 homeostasis modulates the integrity of cardiac muscle structure via MuRF1 regulation.

## 70 **Results and Discussion**

### 71 **NCX1 is required for the maintenance of myofibril integrity in cardiomyocytes**

72 Zebrafish *ncx1h* mutant embryos lack functional NCX1 in myocardial cells resulting in aberrant  $\text{Ca}^{2+}$   
 73 homeostasis and a fibrillating heart (Ebert et al., 2005; Langenbacher et al., 2005; Shimizu et al., 2015).  
 74 Similar to the myofibril phenotype observed in NCX1<sup>-/-</sup> mice, sarcomeres in zebrafish *ncx1h* mutant  
 75 cardiomyocytes are damaged (Koushik et al., 1999; Wakimoto et al., 2003; Ebert et al., 2005). To  
 76 investigate whether NCX1 activity affects the assembly or the maintenance of sarcomeres in myocardial  
 77 cells, we examined the distribution of  $\alpha$ -actinin protein. In striated muscles,  $\alpha$ -actinin is localized to the Z-  
 78 line and is a good marker for assessing sarcomere structure. We found that  $\alpha$ -actinin is organized into a  
 79 periodic banding pattern in both wild type and *ncx1h* mutant cardiomyocytes at 30 hpf (Fig. 1A),  
 80 suggesting that sarcomere assembly is initiated properly in the absence of NCX1 activity. Interestingly,  
 81 the sarcomeres degenerate in *ncx1h* mutant cardiomyocytes a day later resulting in sporadic distribution of  
 82  $\alpha$ -actinin (Fig. 1A). Zebrafish myocardial cells of the outer curvature normally assume an elongated, flat  
 83 shape by two days of development (Auman et al., 2007; Cavanaugh et al., 2015). However, *ncx1h* mutant  
 84 cardiomyocytes fail to elongate (Fig. 1B) and both atrial and ventricular chambers become dysmorphic  
 85 (Fig. 1C), indicating a requirement for NCX1 activity in the maintenance of myofibril integrity and  
 86 cardiac chamber morphology.

### 88 **Elevated MuRF1 expression in *ncx1h*-deficient hearts**

89 To explore molecular pathways by which NCX1 influences myofibril integrity, we isolated hearts  
 90 from wild type and *ncx1h* mutant embryos and compared their gene expression profiles. We found that  
 91 the expression of Muscle Ring-finger protein-1 (MuRF1, also known as TRIM63) is significantly elevated  
 92 in *ncx1h* mutant hearts. There are two highly homologous MuRF1 genes in zebrafish (MuRF1a/trim63a  
 93 and MuRF1b/trim63b) (Macqueen et al., 2014). Phylogenetic analysis showed that zebrafish MuRF1a and

MuRF1b cluster with other vertebrate MuRF1 genes (Fig. S1A). Both genes span a single exon encoding peptides highly homologous to each other and to their mammalian orthologs (Fig. S1B) (Postlethwait, 2007) and are expressed in striated muscles (Fig.S1C) (Willis and Patterson, 2006). In situ hybridization and quantitative RT-PCR analyses further confirmed that both MuRF1a and 1b are upregulated in *ncx1* mutant hearts (Fig. 2).

### **MuRF1 regulates myofibril integrity in cardiomyocytes**

Elevated MuRF1 expression is associated with muscle atrophy and can induce the breakdown of myofibrils in cultured cardiomyocytes (Kedar et al., 2004). We thus asked whether MuRF1 overexpression in the heart is sufficient to induce cardiomyopathy. To this end, we generated a transgenic fish, *myl7:MuRF1a-IRES-GFP*, in which the expression of MuRF1 and GFP reporter is driven by the cardiac-specific *myl7* promoter (Fig. 3A). As shown in Fig.3B, MuRF1 expression is upregulated in *myl7:MuRF1a-IRES-GFP* transgenic hearts. Interestingly,  $\alpha$ -actinin failed to organize into a banded pattern in cardiomyocytes of *myl7:MuRF1a-IRES-GFP* embryos (Fig.3B), demonstrating that overexpression of MuRF1 leads to sarcomere disassembly in the heart (Fig.3C). Consequently, MuRF1-overexpressing hearts become dilated (Fig.3D) and their cardiac function is compromised. The fractional shortening of *myl7:MuRF1a-IRES-GFP* hearts was reduced by approximately 10% compared to non-transgenic siblings and the heart rate was also reduced by 10% (Fig. 3E). Together, these findings demonstrate that overexpression of MuRF1 is sufficient to disrupt myofibril structure and impair cardiac function *in vivo*.

### **Blocking MuRF1-induced protein degradation preserves myofibril integrity in *ncx1h* mutant hearts**

MuRF1's upregulation upon loss of *ncx1h* activity, along with its established function as a muscle-specific E3 ubiquitin protein ligase that targets sarcomeric proteins for proteasome degradation, make it a good candidate for the cause of the myofibril disarray present in *ncx1h* deficient hearts. If MuRF1

upregulation indeed causes sarcomere disassembly, one would predict that blocking MuRF1 activity or its downstream protein degradation pathway might ameliorate the myofibril defects in *ncx1* mutant hearts. Since both MuRF1a and MuRF1b are upregulated in *ncx1h* deficient hearts, we knocked down these genes simultaneously. We found that ~80% of *ncx1h/murfla/murflb* triple-deficient embryos had intact sarcomeres (n=24), a significant increase compared to *ncx1h* mutant hearts (~35%, n=21;  $p<0.001$ ) (Fig. 4). Similarly, treatment with the proteasome inhibitor MG132 suppressed the myofibril disarray caused by NCX1 deficiency. Approximately 72% of MG132-treated *ncx1h* mutants had a banded pattern of  $\alpha$ -actinin indicating intact sarcomeres (n=18;  $p<0.001$ ) (Fig. 4), suggesting that upregulation of MuRF1 induces myofibril degradation via a proteasome-dependent mechanism in *ncx1h*-deficient cardiomyocytes.

## Ca<sup>2+</sup> induces MuRF1a expression

Our study showed that while *ncx1h* mutant hearts never establish normal Ca<sup>2+</sup> cycles or heartbeats, the initial assembly of sarcomeres proceeds properly. Since the Ca<sup>2+</sup> handling defects precede the breakdown of sarcomeres, we hypothesized that Ca<sup>2+</sup> overload induces MuRF1 expression in cardiomyocytes and thereby leads to sarcomere disassembly and cardiomyopathy. To examine this hypothesis, we isolated a 6.9 kb genomic fragment upstream of MuRF1a, MuRF1a (-6906). Transgenic analysis showed that this genomic fragment was sufficient to drive GFP expression in cardiac and skeletal muscles (Fig. 5A and B), a pattern resembling the endogenous MuRF1 expression pattern (Fig. S1C), indicating that critical regulatory elements are present in this genomic fragment. We then created a MuRF1a (-6906) Luciferase reporter construct to test whether this MuRF1 upstream regulatory element is responsive to Ca<sup>2+</sup> signaling. We transfected the MuRF1a (-6906) Luciferase reporter into HEK293T cells and induced Ca<sup>2+</sup> flux by treatment with the Ca<sup>2+</sup> ionophore A23187. Interestingly, the luciferase activity was significantly enhanced by A23187 induction (Fig. 5C), demonstrating that MuRF1 transcription is sensitive to intracellular Ca<sup>2+</sup> levels.

We next tested the expression patterns of a series of deletion constructs of MuRF1a (-6906) and found that the 638 bp region immediately upstream of the transcription initiation site, MuRF1a (-638), was sufficient to drive reporter gene expression in cardiac and skeletal muscles. MuRF1a (-638)-Luc also displayed enhanced luciferase activity upon A23187 induction at levels comparable to MuRF1a (-6906)-Luc (Fig. 5D), indicating that the 638bp MuRF1a proximal region is sufficient to direct  $\text{Ca}^{2+}$ -mediated MuRF1 transcription.

### **$\text{Ca}^{2+}$ regulates MuRF1 expression via the Calcineurin-FoxO signaling pathway**

Calmodulin-dependent protein kinase II (CaMKII) and the calmodulin-dependent protein phosphatase calcineurin (Cn) are two major transducers of  $\text{Ca}^{2+}$  signals in cardiomyocytes (Heineke and Molkentin, 2006; Maillet et al., 2013). We asked whether either of these pathways is involved in the regulation of MuRF1 gene expression. We treated MuRF1a (-638)-Luc-transfected HEK293T cells with either KN62, a chemical inhibitor of CaMKII, or FK506, an inhibitor of Cn. KN62 treatment did not have a significant impact on MuRF1a (-638)-driven expression, but FK506 treatment potently attenuated the A23187-induced increase of MuRF1a (-638)-Luc reporter activity (Fig. 6A), suggesting that MuRF1 expression is regulated by a Cn-mediated mechanism. This interpretation is further supported by the observations that Cn overexpression enhances A23187-induced MuRF1 reporter activity and that the A23187-induced MuRF1 expression is blunted by overexpression of a dominant negative form of Cn (DN-Cn) (Fig. 6B) (Kahl and Means, 2004).

We next explored the molecular link by which Cn influences MuRF1 expression. We found multiple putative FoxO binding sites located the minimal regulatory regions of zebrafish MuRF1a/b and within the 1 kb region immediately upstream of the transcription initiation sites of the frog, mouse and human MuRF1 genes (Fig. 6C). Since FoxO is a downstream mediator of Cn signaling (Hudson and Price, 2013) and is involved in the regulation of MuRF1 in skeletal muscles (Stitt et al., 2004; Waddell et al.,

2008), we examined the possibility that FoxO mediates Cn's regulation of MuRF1 expression in cardiomyocytes. There are seven FoxO genes in zebrafish (Wang et al., 2009), all of which are expressed in the developing heart (Fig. 6D and Fig. S2). When co-transfected with the MuRF1a(-638)-Luc reporter, all zebrafish FoxO genes tested were capable of enhancing the A23187 induction of MuRF1a(-638) luciferase activity (Fig. S3). FoxO3a promoted strong MuRF1a promoter activity (Fig. S3) and was used for the remainder of our analyses. We found that FoxO3a enhanced MuRF1a(-638)-Luc reporter activity in a dose-dependent manner (Fig. 6E) whereas overexpression of a dominant-negative form of FoxO (DN-foxO), which lacks the transactivation domain but harbors an intact DNA binding domain (Medema et al., 2000; van den Heuvel et al., 2005), abrogated the A23187-induced MuRF1a(-638)-Luc activity (Fig. 6F). We next asked whether FoxO mediates Cn signaling to control MuRF1 expression. We found that cotransfection of Cn and FoxO3a enhances MuRF1a promoter activity (Fig. 6B, E) and that FoxO could no longer induce MuRF1a expression in the presence of a dominant negative form of Cn (Fig. 6B, E), demonstrating that  $Ca^{2+}$  influences MuRF1 expression via the Cn-FoxO signaling axis.

## Cn and FoxO regulate MuRF1 expression in the heart

Based on our finding that a Cn-FoxO-MuRF1 regulatory pathway is activated in response to elevated intracellular  $Ca^{2+}$  levels in cultured cells, we explored the significance of the Cn-FoxO-MuRF1 pathway in the regulation of myofibril integrity in myocardial cells *in vivo*. The subcellular localization of FoxO is controlled by its phosphorylation status (Huang and Tindall, 2007). We reasoned that the  $Ca^{2+}$  extrusion defect in *ncx1h* mutant hearts could activate Cn resulting in the dephosphorylation and nuclear translocation of FoxO. Indeed, while FoxO was primarily sequestered in the cytoplasm of cardiomyocytes in wild type zebrafish hearts, FoxO protein was enriched in the nuclei of *ncx1h* mutant cardiomyocytes (Fig. 7A). This nuclear accumulation of FoxO correlated with the increased MuRF1 expression in *ncx1h* mutant hearts (Fig. 2). In addition, we found that MuRF1 expression could also be induced in the heart by overexpression of FoxO3a or a constitutively active form of FoxO3a in which three phosphorylation sites

were replaced by with alanines (CA-FoxO3a: T29A, S236A, S299A) (Fig. 7B) (Brunet et al., 1999). Conversely, pharmacological inhibition of Cn activity by treatment with FK506 or overexpression of DN-FoxO blunted MuRF1 expression in *ncx1h* mutant embryos (Fig. 7B). Finally, we used  $\alpha$ -actinin as a proxy to examine whether the correlation between FoxO and MuRF1 expression translates to the preservation of sarcomere structure. We found that overexpression of CA-FoxO3a in wild type embryos resulted in a sporadic  $\alpha$ -actinin distribution in cardiomyocytes that resembled the phenotype observed in *ncx1h* mutant hearts whereas overexpression of DN-FoxO restored a periodic  $\alpha$ -actinin banding pattern in *ncx1h* mutant hearts (Fig.7C).

## Conclusion

Compromised  $\text{Ca}^{2+}$  homeostasis and damaged cardiac muscles are often observed in deteriorating diseased hearts, but a causative relationship between these outcomes has not previously been demonstrated. In this study, we used the zebrafish *ncx1h* mutant as an animal model to explore the molecular link between  $\text{Ca}^{2+}$  signaling and myofibril integrity in the heart. We showed that NCX1 activity is dispensable for the initial assembly of sarcomeres, but the maintenance of myofibril structure in myocardial cells requires tightly controlled  $\text{Ca}^{2+}$  homeostasis and MuRF1 expression.

Our molecular analyses using cultured cells and *in vivo* studies in zebrafish reveal a FoxO-MuRF1 signaling axis that is critically involved in the  $\text{Ca}^{2+}$ -dependent regulation of myofibril integrity in the heart. We propose that under normal physiological conditions where the cytosolic diastolic  $\text{Ca}^{2+}$  level is low, FoxO is sequestered in the cytoplasm and MuRF1 expression is maintained at a basal level to support the normal turnover of sarcomeric proteins. Under pathological conditions, when diastolic  $\text{Ca}^{2+}$  is elevated, the activation of Cn dephosphorylates FoxO and allows its nuclear translocation, leading to upregulation of MuRF1 and the degradation of myofibrils (Fig.7D). Interfering with the Cn-FoxO-MuRF1-proteasome

217 pathway by pharmacological or genetic means can protect the sarcomeric integrity of cardiomyocytes  
 218 suffering from  $\text{Ca}^{2+}$  dysregulation, and suggest that the FoxO-MuRF1 signaling axis is a central regulator  
 219 of the  $\text{Ca}^{2+}$ -dependent growth and degradation of striated muscles. The activity of the Cn-FoxO-MuRF1  
 220 signaling pathway identified in this study is consistent with the roles of the FoxO-MuRF1 pathway in  
 221 hypertrophy and atrophy responses in skeletal muscles (Sacheck et al., 2004; Stitt et al., 2004; Waddell et  
 222 al., 2008) and suggests that FoxO-MuRF1 signaling is critical in the maintenance of tissue homeostasis  
 223 and in response to pathological stimuli. Furthermore, cardiac-specific overexpression of MuRF1 results  
 224 in phenotypes resembling those observed in cardiomyopathy; the breakdown of sarcomeres and a dilated  
 225 heart with reduced heart rate and decreased contractility, suggesting that misregulation of MuRF1 may  
 226 contribute to pathological progression of cardiovascular diseases. Interestingly, cardiac patients carrying  
 227 specific MuRF1 gene variants have a poor prognosis (Chen et al., 2012; Su et al., 2014), suggesting that  
 228 MuRF1 has a conserved role in the regulation of cardiac structure and function from lower vertebrates to  
 229 humans and raising an intriguing possibility that the Cn-FoxO-MuRF1-proteosome pathway may be an  
 230 attractive point of therapeutic intervention for cardiomyopathies.



## 231 **Materials and Methods**

### 232 **Zebrafish husbandry, chemical treatment and morpholino knockdown**

233 Zebrafish *tremblor*<sup>tc318</sup> heterozygotes were bred in *Tg(myl7:EGFP)* background and raised as  
 234 previously described (Westerfield, 2000). Embryos were raised at 28.5 °C and staged as previously  
 235 described (Kimmel et al., 1995). For Cn or proteasome inhibition, embryos were treated with 10 µM  
 236 FK506 (Sigma-Aldrich) or 50 µM MG132 (Calbiochem) at 24 hpf. The morpholino-modified antisense  
 237 oligonucleotides targeting the translation initiation sites of *MuRF1a* and *MuRF1b* (Table S1, Gene Tools)  
 238 were microinjected at 1- to 2-cell stage (8ng each).

### 240 **Zebrafish transgenesis**

241 Transgenic constructs, *myl7:MuRF1a-IRES-EGFP* and *myl7:FLAG-foxo3a-IRES-EGFP*, were  
 242 generated using the Tol2kit (Kwan et al., 2007). Wild type embryos were injected at the 1-cell stage with  
 243 10-20 pg of the transgene plasmid and 20 pg of mRNA encoding Tol2 transposase. Embryos with cardiac-  
 244 specific EGFP expression were raised as founders.

### 246 **Microarray and quantitative PCR**

247 Wild type and *tre* mutant hearts were isolated at 48 hpf as previously described (Burns and  
 248 MacRae, 2006). Total RNA was purified using RNeasy micro kit (Qiagen). Microarray hybridization  
 249 was performed in triplicate using the Affymetrix Zebrafish GeneChip containing 15,617 genes. Data were  
 250 analyzed using scripts written in the statistical programming language R (Team, 2014). Differentially  
 251 expressed genes were identified using linear models and multiple testing correction implemented in the  
 252 Limma package (Smyth, 2004). The relative expression levels of *MuRF1a* and *MuRF1b* in the wild type  
 253 and *tre* hearts were determined by quantitative PCR using the LightCycler 480 System (Roche Applied  
 254 Science). GAPDH served as the internal control for normalization. Primer sequences used in this study  
 255 are listed in Table S1.

### 257 **In vivo GFP reporter assay**

258 An approximately 7.0-kb genomic fragment upstream of the zebrafish *MuRF1a* gene (ranging  
 259 from -6906 to +80 bp) was amplified from genomic DNA. A deletion series of *MuRF1a*-EGFP construct  
 260 was generated using the ERASE-A-BASE system (Promega). For transient expression analysis, each

deletion construct was digested with NheI and SalI to release the *MuRF1a*-EGFP reporter and microinjected into 1-cell stage embryos. A minimum of 20 EGFP-positive embryos of each group were examined at 1 and 2 days post fertilization using a Zeiss SV-11 epifluorescence microscope.

## **Whole-mount in situ hybridization and immunostaining**

Whole mount in situ hybridization and immunostaining were performed as previously described (Cavanaugh et al., 2015). The antisense RNA probes were synthesized from pCS2+ expression constructs containing a partial genomic fragment (*foxo5a*) or full-length cDNA fragments (*MuRF1a*, *MuRF1b*, *foxo1a*, *foxo1b*, *foxo3a*, *foxo3b*, *foxo4*, and *foxo5b*). Phalloidin (1:50, Sigma-Aldrich) and anti-sarcomeric  $\alpha$ -actinin (1:1000, clone EA53, Sigma-Aldrich),  $\alpha$ -FLAG (1:100, clone M2, Sigma-Aldrich) and Zn8 (1:100, Developmental Studies Hybridoma Bank) were used for immunostaining. Fluorescence images were acquired using LSM 510 confocal microscope (Zeiss) with a 40x water objective.

## **Cardiac imaging and analysis**

Videos of *Tg(myl7:MuRF1-IRES-EGFP)* and *Tg(myl7:EGFP)* hearts were taken at 30 frames per second. Cardiac parameters were assessed by line-scan analysis as previously described (Shimizu et al., 2015). Embryos in the *Tg(myl7:gCaMP4)* background was used for  $Ca^{2+}$  imaging as previously described (Shimizu et al., 2015).

## **Cell-based luciferase assay**

HEK293T cells were plated into 96-well plates at a density of 32000 cells per well and transfected with 200 ng of the *MuRF1a* (-6906)- or *MuRF1a* (-638)-luciferase reporter construct, 50 ng of the SV40-*Renilla* luciferase reporter construct and expression vectors (Cn, DN-Cn, *foxo3a*, CA-*foxo3a* or DN-*foxo3a*). Cells were treated with 5 $\mu$ M A23187 (Sigma-Aldrich), 0.5 $\mu$ M FK506 (Sigma-Aldrich) or 0.5 $\mu$ M KN62 (Sigma-Aldrich). Luciferase activities were determined by the Dual-Glo Luciferase Assay System

286 (Promega) in triplicate at least three times, and the activity of firefly luciferase was normalized to that of  
287 *Renilla* luciferase for transfection efficiency and cell viability.

288

## 289 **Statistics**

290 Data are presented as the mean  $\pm$  S.E. *p*-values associated with all comparisons are based on Student's t-  
291 tests ( $n \geq 3$ ) unless otherwise stated.

## 292    **Acknowledgements**

293    The authors thank members of the Chen Lab for stimulating discussions. This work was supported by  
 294    grants from the Nakajima Foundation (to HS), the National Institute of Health (HL096980 and HL126051  
 295    to JNC and HL108186 to YW), European Commission's Sixth Framework Programme (ZF-MODELS  
 296    project to RG) and Seventh Framework Programme (ZF-HEALTH project to RG).

297

298    The authors declare no competing financial interests.

## 299 References

- 300 Auman, H.J., Coleman, H., Riley, H.E., Olale, F., Tsai, H.J., and Yelon, D. (2007). Functional modulation  
301 of cardiac form through regionally confined cell shape changes. *PLoS Biol* 5, e53.  
302
- 303 Baehr, L.M., Furlow, J.D., and Bodine, S.C. (2011). Muscle sparing in muscle RING finger 1 null mice:  
304 response to synthetic glucocorticoids. *J Physiol* 589, 4759-4776.  
305
- 306 Bers, D.M. (2002). Cardiac excitation-contraction coupling. *Nature* 415, 198-205.  
307
- 308 Bodine, S.C., and Baehr, L.M. (2014). Skeletal muscle atrophy and the E3 ubiquitin ligases MuRF1 and  
309 MAFbx/atrogen-1. *American journal of physiology Endocrinology and metabolism* 307, E469-484.  
310
- 311 Bodine, S.C., Latres, E., Baumhueter, S., Lai, V.K., Nunez, L., Clarke, B.A., Poueymirou, W.T., Panaro,  
312 F.J., Na, E., Dharmarajan, K., *et al.* (2001). Identification of ubiquitin ligases required for skeletal muscle  
313 atrophy. *Science* 294, 1704-1708.  
314
- 315 Brunet, A., Bonni, A., Zigmond, M.J., Lin, M.Z., Juo, P., Hu, L.S., Anderson, M.J., Arden, K.C., Blenis,  
316 J., and Greenberg, M.E. (1999). Akt promotes cell survival by phosphorylating and inhibiting a Forkhead  
317 transcription factor. *Cell* 96, 857-868.  
318
- 319 Burns, C.G., and MacRae, C.A. (2006). Purification of hearts from zebrafish embryos. *Biotechniques* 40,  
320 274, 276, 278 passim.  
321
- 322 Cavanaugh, A.M., Huang, J., and Chen, J.N. (2015). Two developmentally distinct populations of neural  
323 crest cells contribute to the zebrafish heart. *Dev Biol* 404, 103-112.  
324
- 325 Chen, S.N., Czernuszewicz, G., Tan, Y., Lombardi, R., Jin, J., Willerson, J.T., and Marian, A.J. (2012).  
326 Human molecular genetic and functional studies identify TRIM63, encoding Muscle RING Finger Protein  
327 1, as a novel gene for human hypertrophic cardiomyopathy. *Circ Res* 111, 907-919.  
328
- 329 Clarke, B.A., Drujan, D., Willis, M.S., Murphy, L.O., Corpina, R.A., Burova, E., Rakhilin, S.V., Stitt,  
330 T.N., Patterson, C., Latres, E., *et al.* (2007). The E3 Ligase MuRF1 degrades myosin heavy chain protein  
331 in dexamethasone-treated skeletal muscle. *Cell Metab* 6, 376-385.  
332
- 333 Cohen, S., Brault, J.J., Gygi, S.P., Glass, D.J., Valenzuela, D.M., Gartner, C., Latres, E., and Goldberg,  
334 A.L. (2009). During muscle atrophy, thick, but not thin, filament components are degraded by MuRF1-  
335 dependent ubiquitylation. *J Cell Biol* 185, 1083-1095.  
336
- 337 Ebert, A.M., Hume, G.L., Warren, K.S., Cook, N.P., Burns, C.G., Mohideen, M.A., Siegal, G., Yelon, D.,  
338 Fishman, M.C., and Garrity, D.M. (2005). Calcium extrusion is critical for cardiac morphogenesis and  
339 rhythm in embryonic zebrafish hearts. *Proc Natl Acad Sci U S A* 102, 17705-17710.  
340
- 341 Files, D.C., D'Alessio, F.R., Johnston, L.F., Kesari, P., Aggarwal, N.R., Garibaldi, B.T., Mock, J.R.,  
342 Simmers, J.L., DeGorordo, A., Murdoch, J., *et al.* (2012). A critical role for muscle ring finger-1 in acute  
343 lung injury-associated skeletal muscle wasting. *American journal of respiratory and critical care medicine*  
344 185, 825-834.  
345

346 Gomes, A.V., Waddell, D.S., Siu, R., Stein, M., Dewey, S., Furlow, J.D., and Bodine, S.C. (2012).  
 347 Upregulation of proteasome activity in muscle RING finger 1-null mice following denervation. *FASEB J*  
 348 *26*, 2986-2999.  
 349  
 350 Heineke, J., and Molkentin, J.D. (2006). Regulation of cardiac hypertrophy by intracellular signalling  
 351 pathways. *Nat Rev Mol Cell Biol* *7*, 589-600.  
 352  
 353 Huang, H., and Tindall, D.J. (2007). Dynamic FoxO transcription factors. *J Cell Sci* *120*, 2479-2487.  
 354 Hudson, M.B., and Price, S.R. (2013). Calcineurin: a poorly understood regulator of muscle mass. *The*  
 355 *international journal of biochemistry & cell biology* *45*, 2173-2178.  
 356  
 357 Kahl, C.R., and Means, A.R. (2004). Calcineurin regulates cyclin D1 accumulation in growth-stimulated  
 358 fibroblasts. *Mol Biol Cell* *15*, 1833-1842.  
 359  
 360 Kedar, V., McDonough, H., Arya, R., Li, H.H., Rockman, H.A., and Patterson, C. (2004). Muscle-  
 361 specific RING finger 1 is a bona fide ubiquitin ligase that degrades cardiac troponin I. *Proc Natl Acad Sci*  
 362 *U S A* *101*, 18135-18140.  
 363  
 364 Kimmel, C.B., Ballard, W.W., Kimmel, S.R., Ullmann, B., and Schilling, T.F. (1995). Stages of  
 365 embryonic development of the zebrafish. *Dev Dyn* *203*, 253-310.  
 366  
 367 Koushik, S.V., Bundy, J., and Conway, S.J. (1999). Sodium-calcium exchanger is initially expressed in a  
 368 heart-restricted pattern within the early mouse embryo. *Mech Dev* *88*, 119-122.  
 369  
 370 Koushik, S.V., Wang, J., Rogers, R., Moskophidis, D., Lambert, N.A., Creazzo, T.L., and Conway, S.J.  
 371 (2001). Targeted inactivation of the sodium-calcium exchanger (Ncx1) results in the lack of a heartbeat  
 372 and abnormal myofibrillar organization. *FASEB J* *15*, 1209-1211.  
 373  
 374 Kwan, K.M., Fujimoto, E., Grabher, C., Mangum, B.D., Hardy, M.E., Campbell, D.S., Parant, J.M., Yost,  
 375 H.J., Kanki, J.P., and Chien, C.B. (2007). The Tol2kit: a multisite gateway-based construction kit for Tol2  
 376 transposon transgenesis constructs. *Dev Dyn* *236*, 3088-3099.  
 377  
 378 Labeit, S., Kohl, C.H., Witt, C.C., Labeit, D., Jung, J., and Granzier, H. (2010). Modulation of muscle  
 379 atrophy, fatigue and MLC phosphorylation by MuRF1 as indicated by hindlimb suspension studies on  
 380 MuRF1-KO mice. *J Biomed Biotechnol* *2010*, 693741.  
 381  
 382 Langenbacher, A.D., Dong, Y., Shu, X., Choi, J., Nicoll, D.A., Goldhaber, J.I., Philipson, K.D., and Chen,  
 383 J.N. (2005). Mutation in sodium-calcium exchanger 1 (NCX1) causes cardiac fibrillation in zebrafish.  
 384 *Proc Natl Acad Sci U S A* *102*, 17699-17704.  
 385  
 386 Lecker, S.H., Jagoe, R.T., Gilbert, A., Gomes, M., Baracos, V., Bailey, J., Price, S.R., Mitch, W.E., and  
 387 Goldberg, A.L. (2004). Multiple types of skeletal muscle atrophy involve a common program of changes  
 388 in gene expression. *FASEB J* *18*, 39-51.  
 389  
 390 Lopes, L.R., and Elliott, P.M. (2014). A straightforward guide to the sarcomeric basis of  
 391 cardiomyopathies. *Heart* *100*, 1916-1923.  
 392  
 393 Luo, M., and Anderson, M.E. (2013). Mechanisms of altered Ca(2+)(+) handling in heart failure. *Circ Res*  
 394 *113*, 690-708.

- 395
- 396 Lyon, R.C., Lange, S., and Sheikh, F. (2013). Breaking down protein degradation mechanisms in cardiac
- 397 muscle. *Trends Mol Med* 19, 239-249.
- 398
- 399 Macqueen, D.J., Fuentes, E.N., Valdes, J.A., Molina, A., and Martin, S.A. (2014). The vertebrate muscle-
- 400 specific RING finger protein family includes MuRF4--a novel, conserved E3-ubiquitin ligase. *FEBS Lett*
- 401 588, 4390-4397.
- 402
- 403 Maillet, M., van Berlo, J.H., and Molkentin, J.D. (2013). Molecular basis of physiological heart growth:
- 404 fundamental concepts and new players. *Nat Rev Mol Cell Biol* 14, 38-48.
- 405
- 406 Mearini, G., Gedicke, C., Schlossarek, S., Witt, C.C., Kramer, E., Cao, P., Gomes, M.D., Lecker, S.H.,
- 407 Labeit, S., Willis, M.S., *et al.* (2010). Atrogin-1 and MuRF1 regulate cardiac MyBP-C levels via different
- 408 mechanisms. *Cardiovasc Res* 85, 357-366.
- 409
- 410 Medema, R.H., Kops, G.J., Bos, J.L., and Burgering, B.M. (2000). AFX-like Forkhead transcription
- 411 factors mediate cell-cycle regulation by Ras and PKB through p27kip1. *Nature* 404, 782-787.
- 412
- 413 Ottolia, M., Torres, N., Bridge, J.H., Philipson, K.D., and Goldhaber, J.I. (2013). Na/Ca exchange and
- 414 contraction of the heart. *J Mol Cell Cardiol* 61, 28-33.
- 415
- 416 Pagan, J., Seto, T., Pagano, M., and Cittadini, A. (2013). Role of the ubiquitin proteasome system in the
- 417 heart. *Circ Res* 112, 1046-1058.
- 418
- 419 Paula-Gomes, S., Goncalves, D.A., Baviera, A.M., Zanon, N.M., Navegantes, L.C., and Kettelhut, I.C.
- 420 (2013). Insulin suppresses atrophy- and autophagy-related genes in heart tissue and cardiomyocytes
- 421 through AKT/FOXO signaling. *Hormone and metabolic research* 45, 849-855.
- 422
- 423 Postlethwait, J.H. (2007). The zebrafish genome in context: ohnologs gone missing. *J Exp Zool B Mol*
- 424 *Dev Evol* 308, 563-577.
- 425
- 426 Sacke, J.M., Ohtsuka, A., McLary, S.C., and Goldberg, A.L. (2004). IGF-I stimulates muscle growth by
- 427 suppressing protein breakdown and expression of atrophy-related ubiquitin ligases, atrogin-1 and MuRF1.
- 428 *American journal of physiology Endocrinology and metabolism* 287, E591-601.
- 429
- 430 Shimizu, H., Schredelseker, J., Huang, J., Lu, K., Naghdi, S., Lu, F., Franklin, S., Fiji, H.D., Wang, K.,
- 431 Zhu, H., *et al.* (2015). Mitochondrial Ca(2+) uptake by the voltage-dependent anion channel 2 regulates
- 432 cardiac rhythmicity. *eLife* 4.
- 433
- 434 Skurk, C., Izumiya, Y., Maatz, H., Razeghi, P., Shiojima, I., Sandri, M., Sato, K., Zeng, L., Schiekofer,
- 435 S., Pimentel, D., *et al.* (2005). The FOXO3a transcription factor regulates cardiac myocyte size
- 436 downstream of AKT signaling. *J Biol Chem* 280, 20814-20823.
- 437
- 438 Smyth, G.K. (2004). Linear models and empirical bayes methods for assessing differential expression in
- 439 microarray experiments. *Stat Appl Genet Mol Biol* 3, Article3.
- 440
- 441 Stitt, T.N., Drujan, D., Clarke, B.A., Panaro, F., Timofeyeva, Y., Kline, W.O., Gonzalez, M., Yancopoulos,
- 442 G.D., and Glass, D.J. (2004). The IGF-1/PI3K/Akt pathway prevents expression of muscle atrophy-
- 443 induced ubiquitin ligases by inhibiting FOXO transcription factors. *Mol Cell* 14, 395-403.



- Su, M., Wang, J., Kang, L., Wang, Y., Zou, Y., Feng, X., Wang, D., Ahmad, F., Zhou, X., Hui, R., *et al.* (2014). Rare variants in genes encoding MuRF1 and MuRF2 are modifiers of hypertrophic cardiomyopathy. *International journal of molecular sciences* *15*, 9302-9313.
- Team, R.C. (2014). R: A language and environment for statistical computing. (R Foundation for Statistical Computing.: Vienna, Austria).
- van den Heuvel, A.P., Schulze, A., and Burgering, B.M. (2005). Direct control of caveolin-1 expression by FOXO transcription factors. *Biochem J* *385*, 795-802.
- Waddell, D.S., Baehr, L.M., van den Brandt, J., Johnsen, S.A., Reichardt, H.M., Furlow, J.D., and Bodine, S.C. (2008). The glucocorticoid receptor and FOXO1 synergistically activate the skeletal muscle atrophy-associated MuRF1 gene. *American journal of physiology Endocrinology and metabolism* *295*, E785-797.
- Wakimoto, K., Fujimura, H., Iwamoto, T., Oka, T., Kobayashi, K., Kita, S., Kudoh, S., Kuro-o, M., Nabeshima, Y., Shigekawa, M., *et al.* (2003). Na<sup>+</sup>/Ca<sup>2+</sup> exchanger-deficient mice have disorganized myofibrils and swollen mitochondria in cardiomyocytes. *Comparative biochemistry and physiology Part B, Biochemistry & molecular biology* *135*, 9-15.
- Wang, M., Zhang, X., Zhao, H., Wang, Q., and Pan, Y. (2009). FoxO gene family evolution in vertebrates. *BMC evolutionary biology* *9*, 222.
- Westerfield, M. (2000). The zebrafish book (The University of Oregon Press).
- Willis, M.S., Ike, C., Li, L., Wang, D.Z., Glass, D.J., and Patterson, C. (2007). Muscle ring finger 1, but not muscle ring finger 2, regulates cardiac hypertrophy in vivo. *Circ Res* *100*, 456-459.
- Willis, M.S., and Patterson, C. (2006). Into the heart: the emerging role of the ubiquitin-proteasome system. *J Mol Cell Cardiol* *41*, 567-579.
- Willis, M.S., Rojas, M., Li, L., Selzman, C.H., Tang, R.H., Stansfield, W.E., Rodriguez, J.E., Glass, D.J., and Patterson, C. (2009a). Muscle ring finger 1 mediates cardiac atrophy in vivo. *Am J Physiol Heart Circ Physiol* *296*, H997-H1006.
- Willis, M.S., Schisler, J.C., Li, L., Rodriguez, J.E., Hilliard, E.G., Charles, P.C., and Patterson, C. (2009b). Cardiac muscle ring finger-1 increases susceptibility to heart failure in vivo. *Circ Res* *105*, 80-88.
- Willis, M.S., Wadosky, K.M., Rodriguez, J.E., Schisler, J.C., Lockyer, P., Hilliard, E.G., Glass, D.J., and Patterson, C. (2014). Muscle ring finger 1 and muscle ring finger 2 are necessary but functionally redundant during developmental cardiac growth and regulate E2F1-mediated gene expression in vivo. *Cell biochemistry and function* *32*, 39-50.



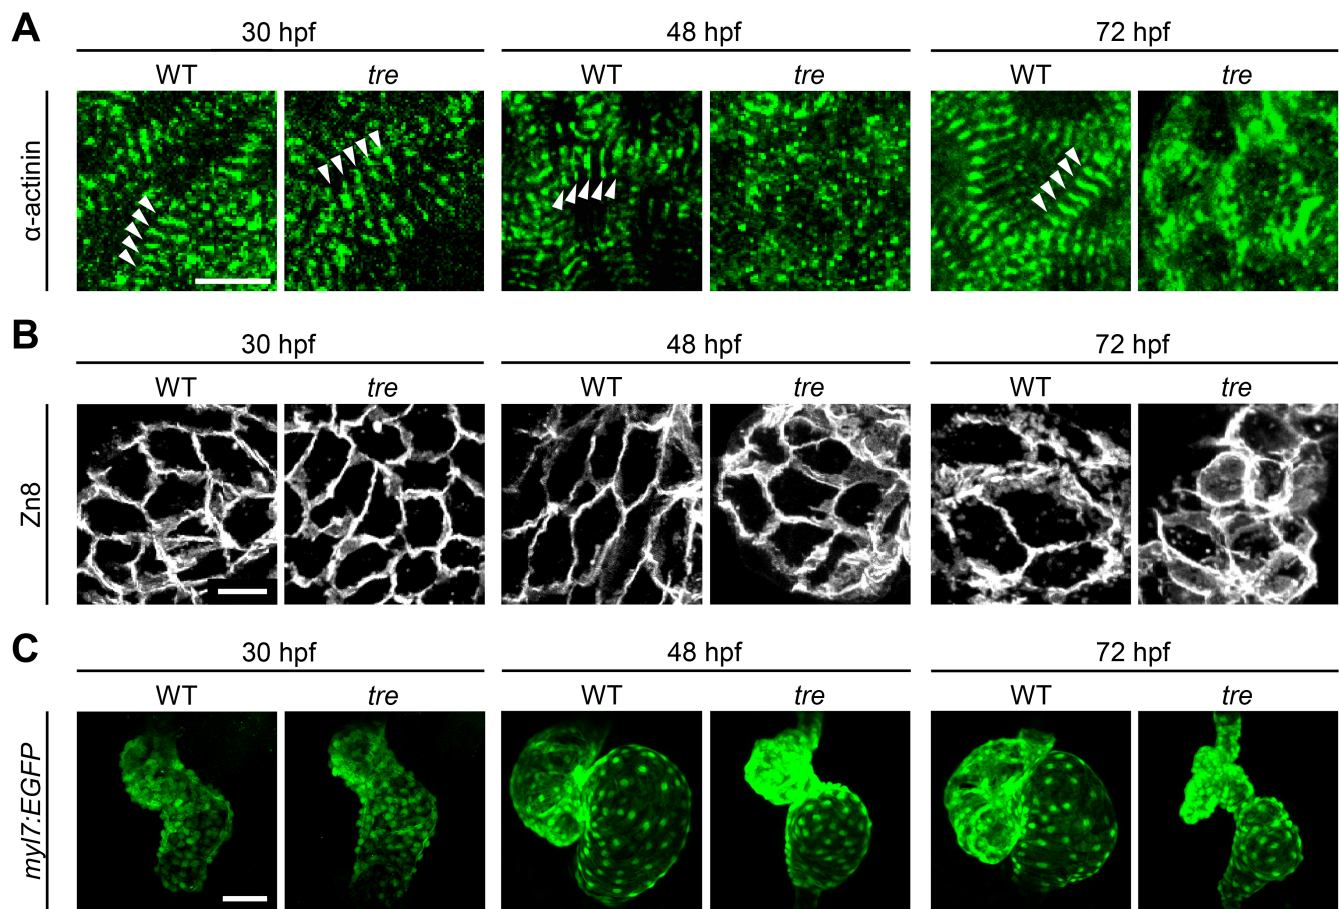

**Figure 1. Disorganized myofibril structure in *ncx1h* cardiomyocytes.** Wild type (WT) and *ncx1h* (*tre*) mutant hearts at 30, 48 and 72 hpf. (A) Zebrafish hearts stained for  $\alpha$ -actinin to visualize Z-lines. At 30 hpf, periodic  $\alpha$ -actinin staining was observed in wild type and *ncx1h* hearts (arrowheads). By 48 hpf, sarcomeres are disassembled in *ncx1h* hearts. Scale bar, 10  $\mu$ m. (B) The cell shape of cardiomyocytes was visualized by Zn8 staining. Scale bar, 10  $\mu$ m. (C) Embryonic fish hearts were visualized by GFP expression in *myl7:EGFP* transgenic background. Note that *ncx1h* hearts become dysmorphic after two days of development. Scale bar, 50  $\mu$ m.

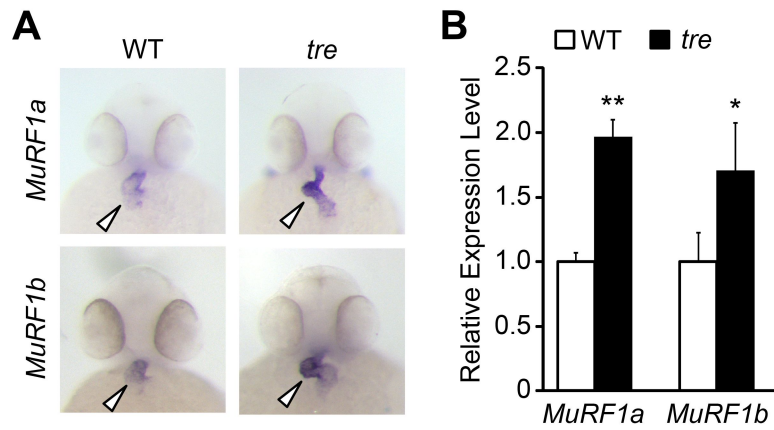

**Figure 2. Upregulation of *MuRF1* in *ncx1h* deficient hearts.** (A) In situ hybridization analysis shows a significant increase of *MuRF1a* and *MuRF1b* expression in *ncx1* hearts. Arrowheads point to the heart. (B) Quantitative RT-PCR analysis shows an upregulation of *MuRF1a* and *MuRF1b* in *ncx1* hearts.

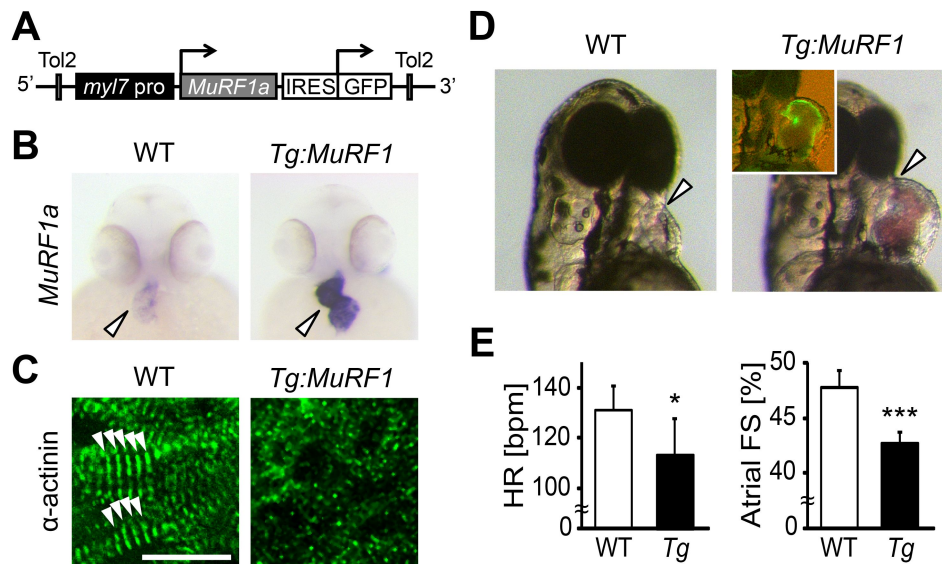

**Figure 3. Upregulation of *MuRF1a* leads to myofibril disarray.** (A) Schematic representation of the construct that drives cardiac-specific *MuRF1a* expression. (B) *MuRF1a* expression is upregulated in the *myl7:MuRF1a-IRES-GFP* heart (right panel) compared to the wild type heart (left panel). (C)  $\alpha$ -actinin staining in wild type (left panel) and transgenic (right panel) cardiomyocytes. Note that sarcomeres are disassembled in *myl7:MuRF1a-IRES-GFP* cardiomyocytes. (D) Live images of wild type and *Tg(my7:MuRF1a-IRES-GFP)* fish at 72 hpf (left panels). Transgenic hearts are GFP positive and become dilated (inset). (E) Heart rate (HR) and atrial fractional shortening (AFS) in wild type and *myl7:MuRF1a-IRES-GFP* embryos. \*,  $p < 0.05$ ; \*\*\*,  $p < 0.001$ .

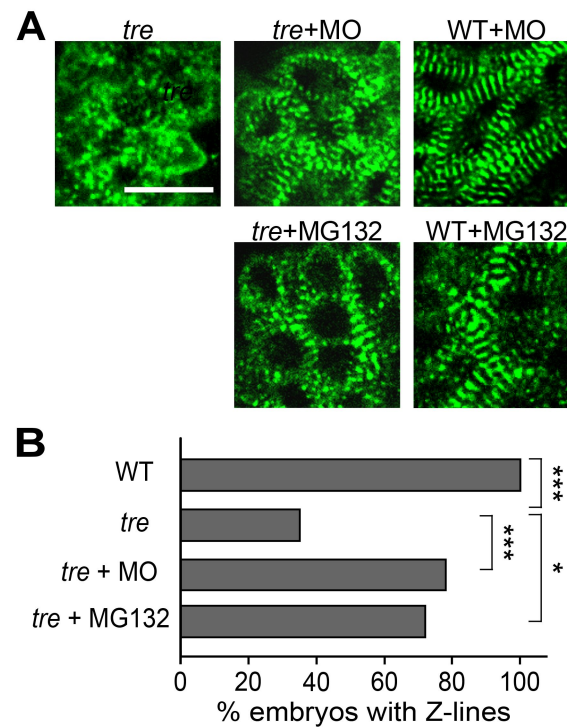

**Figure 4. Blocking MuRF1-mediated proteasome degradation preserves myofibril integrity in *ncx1* deficient hearts.** (A) Z-lines were visualized by  $\alpha$ -actinin staining. By 72 hpf, sarcomeres are disassembled in *ncx1h* hearts. MuRF1a/MuRF1b knockdown does not affect sarcomere integrity in wild type embryos (WT+MO), but prevents sarcomere degradation in *ncx1h* (*ncx1h*+MO). Similarly, treatment with a proteasome inhibitor, MG132, preserves myofibril integrity in *ncx1h* cardiomyocytes (*ncx1h*+MG132). Scale bar, 10  $\mu$ m. (B) Graph shows % of embryos with periodic  $\alpha$ -actinin staining. Chi-squared test, \*,  $p < 0.05$ ; \*\*,  $p < 0.01$ ; \*\*\*,  $p < 0.001$ .

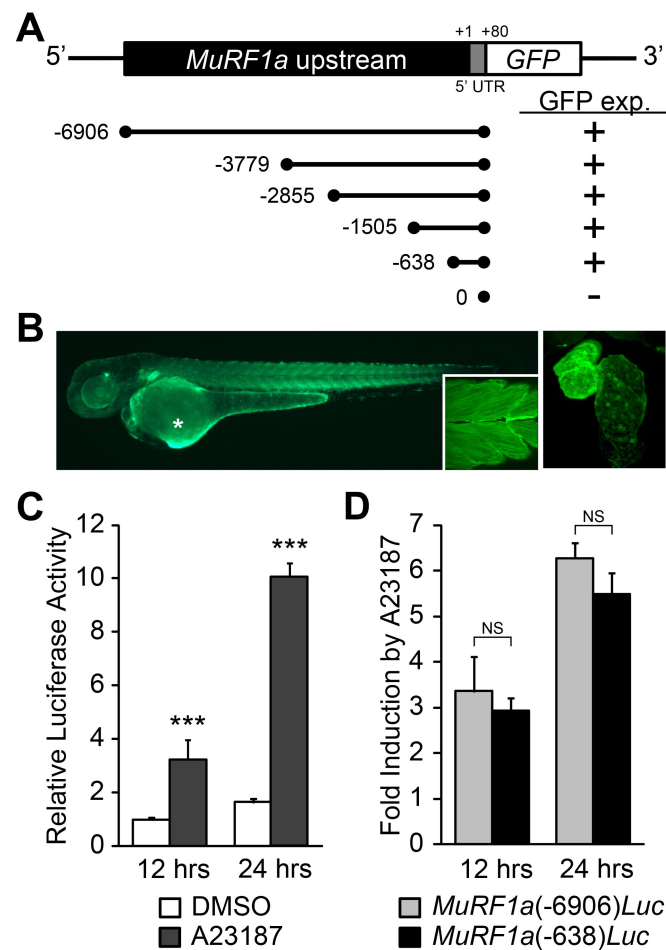

**Figure 5. Identification of MuRF1a regulatory element.** (A) Schematic representation of MuRF1a reporter constructs. + denotes the presence of GFP expression in the heart and somites. (B) MuRF1a (-6906)-GFP embryo shows GFP expression in the heart and the somites (inset shows higher magnification image of the somites). The right panel shows a higher magnification image of the heart. The asterisk denotes auto-fluorescence from the yolk. (C) A23187 treatment induces luciferase activity driven by MuRF1a (-6906) promoter. Values represent the fold increase compared to cells treated with DMSO for 12 hours. (D) Comparison of  $\text{Ca}^{2+}$  responsiveness between MuRF1a (-638) and MuRF1a (-6906) promoters. Values represent A23187 treatment induced fold increase of luciferase activities. \*\*\*,  $p < 0.001$ ; NS, not significant.

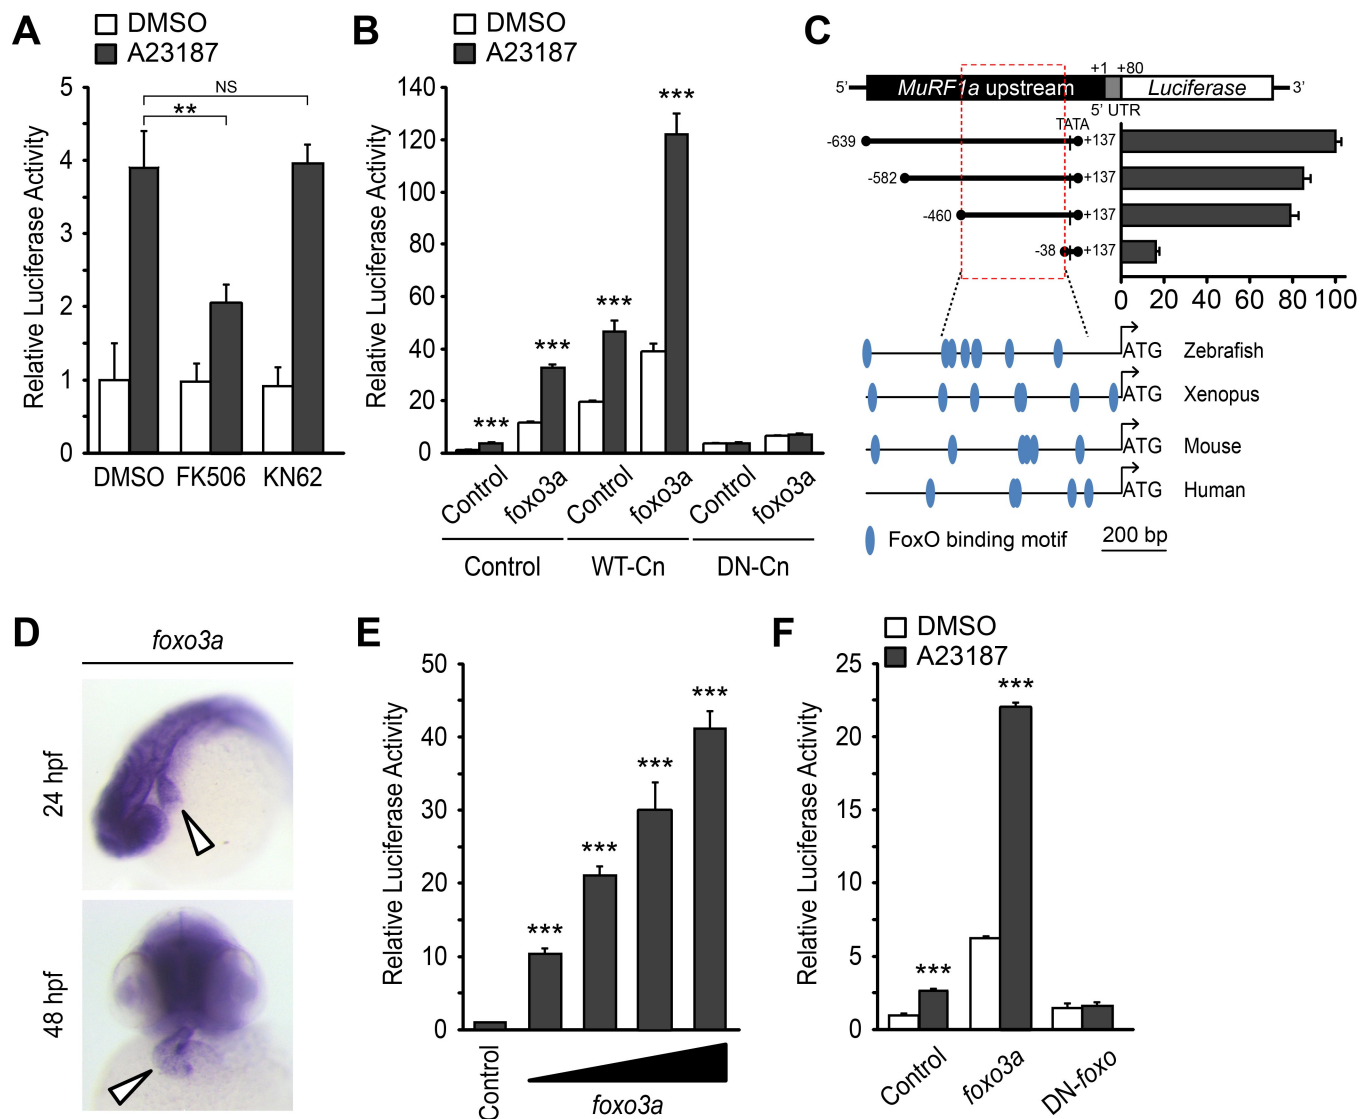

**Figure 6.  $\text{Ca}^{2+}$ -Cn-FoxO signaling pathway regulates MuRF1 expression.**

(A) HEK293T cells were transiently transfected with the MuRF1a (-638) luciferase reporter construct. Cells were incubated with FK506 or KN62 before DMSO or A23187 treatment. (B) Luciferase assay of the MuRF1a (-638) reporter cotransfected with *foxo3a*, wild type calcineurin (WT-Cn) or dominant-negative calcineurin (DN-Cn). (C) Diagrams represent serial deletion of the MuRF1a (-638) reporter. Bar graphs show luciferase activity of each reporter construct relative to that of the empty expression plasmid. Red dotted box indicates the minimal *cis*-regulatory element of MuRF1a. Lower diagrams represent the alignment of zebrafish, *Xenopus*, mouse and human MuRF1 promoters. Blue circles indicate putative FoxO binding sites (D) Whole-mount in situ hybridization detects *foxo3a* expression in the zebrafish heart. White arrowheads point to the heart. (E) HEK293T cells were transfected with the MuRF1a (-638) luciferase reporter and *foxo3a* expression plasmid. (F) HEK293T cells were transfected with MuRF1a (-638) reporter plasmid and either wild type or dominant negative *foxo3a* expression plasmid. Values are expressed relative to the luciferase activity of DMSO treated cells. \*\*,  $p < 0.01$ ; \*\*\*,  $p < 0.001$ ; NS, not significant.



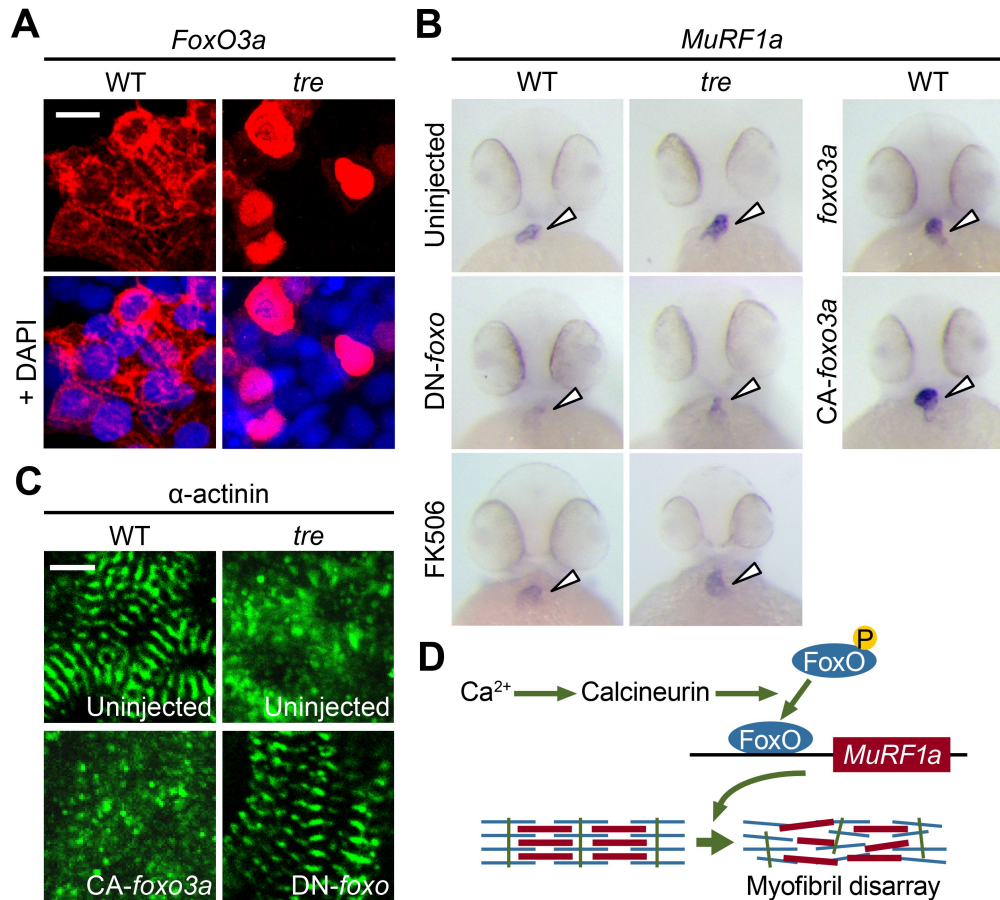

**Figure 7. FoxO3a regulates MuRF1 expression in the heart.** (A) FoxO3 is predominantly localized in the cytoplasm of wild type cardiomyocytes, but is accumulated in the nuclei of *ncx1h* cardiomyocytes. FoxO3 is pseudo colored in red and nuclei are labeled by DAPI in blue. Scale bar: 10  $\mu$ m. (B) In situ hybridization showing stronger MuRF1 signals in *ncx1h* mutant and CA-foxo3a injected hearts compared to wild type siblings. MuRF1a expression in *ncx1h* hearts is suppressed by DN-foxo overexpression or FK506 treatment. (C) Immunostaining for the  $\alpha$ -actinin in 2 dpf hearts. Intact sarcomeres were detected in control (uninjected) and DN-foxo3a injected *ncx1h* hearts whereas disassembled sarcomeres were observed in *ncx1h* and CA-foxo3a injected hearts. Scale bar: 5  $\mu$ m. (D) Model for Ca<sup>2+</sup> overload-induced myofibril disarray. Calcineurin dephosphorylates FoxO leading to FoxO nuclear translocation, MuRF1 expression and sarcomere disassembly.

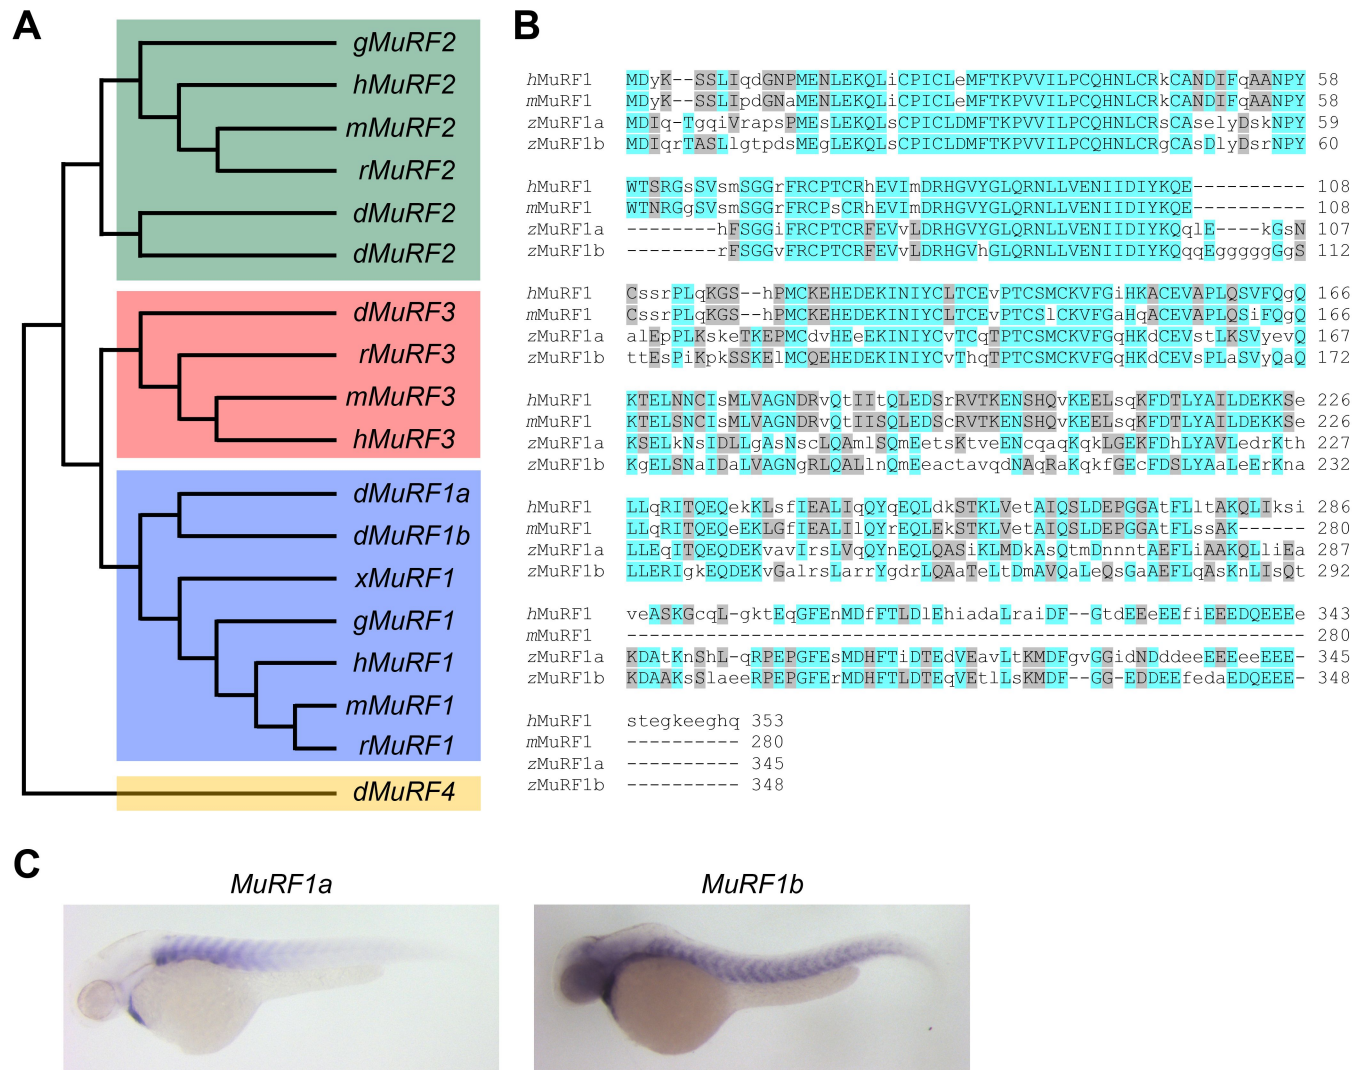

**Figure S1. Zebrafish MuRF1 genes.** (A) Phylogenetic tree of vertebrate *MuRF1*, 2, 3 and 4 (also known as *trim63*, 55, 54 and *101*, respectively). The tree was constructed using ClustalX with the neighbor-joining method. Zebrafish (z), Human (h), mouse (m), rat (r), chick (g), frog (x). (B) Alignment of *MuRF1* genes from human, mouse and the zebrafish. Blue boxes highlight identical amino acids and grey boxes indicate similar residues. (C) Whole-mount in situ hybridization demonstrating the expression patterns of *MuRF1a* and *1b* in the zebrafish embryo.



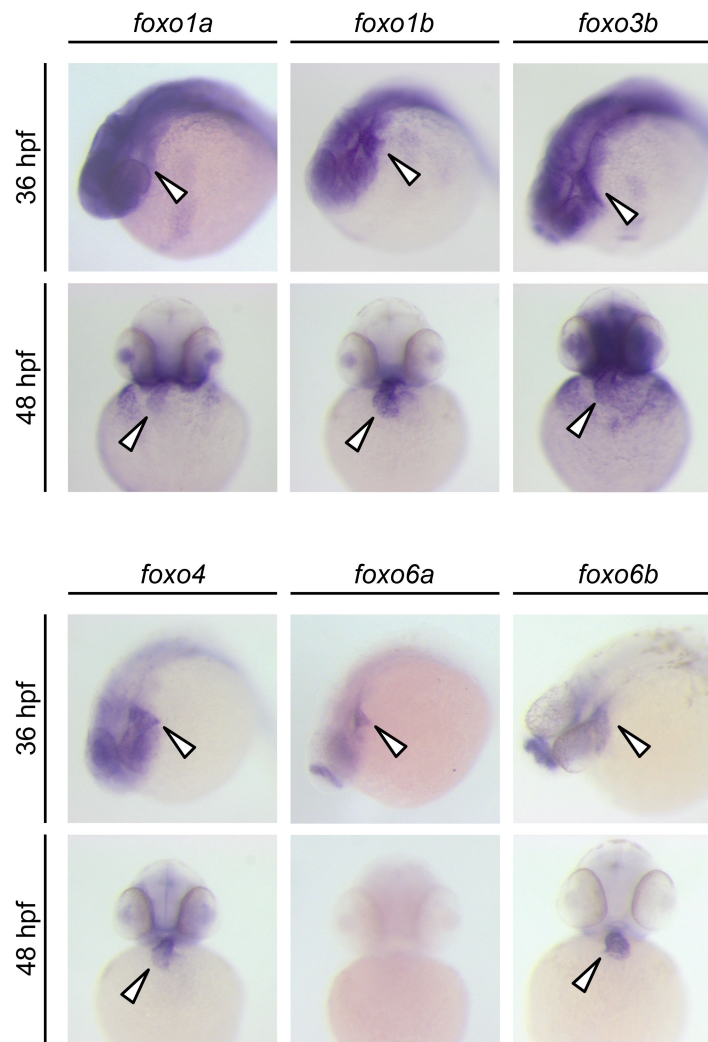

**Figure S2. Expression patterns of zebrafish *foxo* genes.** Whole-mount in situ hybridization analysis showing *foxo* expression in zebrafish embryos. While *foxo6a* expression is diminished by 48 hpf, all the other *foxo* genes examined (*foxo1a*, *1b*, *3b*, *4*, *6a* and *6b*) are persistently expressed in the heart. Arrowheads point to the heart.

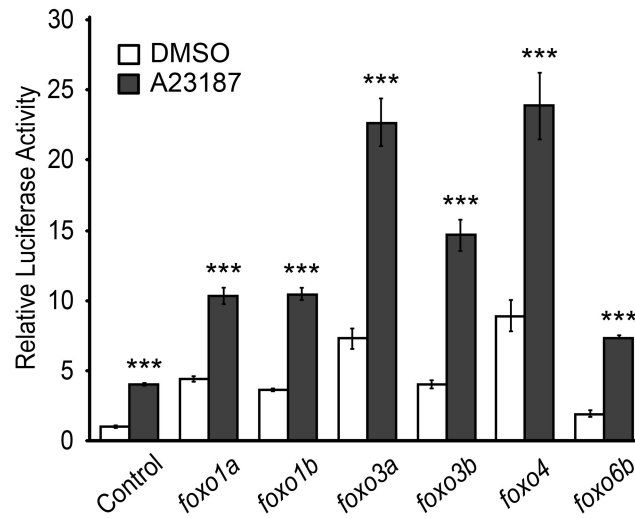

**Figure S3. FoxO induces MuRF1 expression.** Luciferase activity of the MuRF1a (-638) reporter cotransfected with different *foxo* genes. Values are expressed relative to the luciferase activity of DMSO treated cells. \*\*\*,  $p < 0.001$

**Table S1. Primers and morpholinos used in this manuscript**

| Experiment          | Target gene                             | Sequence                                                                                |
|---------------------|-----------------------------------------|-----------------------------------------------------------------------------------------|
| Quantitative RT-PCR | <i>MuRF1a</i>                           | F: 5' - GGAAGAAA <u>ACTGCCAGGCACAG</u> -3'<br>R: 5' - CTGGGTGATCTGCTCCAGAAGATG -3'      |
|                     | <i>MuRF1b</i>                           | F: 5' - CAGGACAATGCTCAACGTGCC -3'<br>R: 5' - CTTGCTCTTTGCCAATACGCTCTAAGAG -3'           |
| Molecular cloning*  | <i>MuRF1a</i>                           | F: 5' - CTGAGGTACCAAGCAGTGAAGGTTA -3'<br>R: 5' - GCTAGGTACCAGTCTCTCATTTGCTT -3'         |
|                     | <i>MuRF1b</i>                           | F: 5' - CTATGGATCCCTGCAGGAATCATTTAC -3'<br>R: 5' - GTTACTCGAGCATTTGTCAATGACCTTG -3'     |
|                     | <i>foxo1a</i>                           | F: 5' - GTCTGAATTCCAGTATTGCTGGTACCATG -3'<br>R: 5' - CATTGCTAGCACTACCCAGACACCCAG -3'    |
|                     | <i>foxo1b</i>                           | F: 5' - GTATGGATCCCTTGGTGATGGCAGAACC -3'<br>R: 5' - GTATCTCGAGCAGCAGATGACATGTCTATC -3'  |
|                     | <i>foxo3a</i>                           | F: 5' - GTATGGATCCGGAGTCGAGGAAATATGG -3'<br>R: 5' - GTATCTCGAGCAGTTGCTTTACAGTGGAC -3'   |
|                     | <i>foxo3b</i>                           | F: 5' - GTATGGATCCCGACCAAGACAGTAAAGAG -3'<br>R: 5' - GTATCTCGAGCTGAGCAATTTCCATCAG -3'   |
|                     | <i>foxo4</i>                            | F: 5' - GTCTGAATTCCATCGCACAAATGGAGG -3'<br>R: 5' - CATTGCTAGCCAACAGTGGAGTTAGCT -3'      |
|                     | <i>foxo6a</i>                           | F: 5' - ATGAGGATCCAACTCCATTAGACACAACC -3'<br>R: 5' - GCTAGAATTCTGTGATTGTTGAGGTCC -3'    |
|                     | <i>foxo6b</i>                           | F: 5' - ATGAGGATCCCGGTTTCTTAAGCACAGAAG -3'<br>R: 5' - ATGAGAATTCTGACATTTATCCAGGCACC -3' |
|                     | <i>MuRF1a(-6906)</i>                    | F: 5' - GTTAGCTAGCCGACTTACTCACTCC -3'                                                   |
|                     | <i>MuRF1a(-639)</i>                     | F: 5' - GTACTTGGAGCGGCCGAATAA -3'                                                       |
|                     | <i>MuRF1a(-582)</i>                     | F: 5' - GTCAGCTAGCCCAACCCAGACAATATATTACT -3'                                            |
|                     | <i>MuRF1a(-460)</i>                     | F: 5' - GTCGGCTAGCGGGAAATAATAATATTGTGATTG -3'                                           |
|                     | <i>MuRF1a(-38)</i>                      | F: 5' - GACTGCTAGCCGGCTGGTATATAAGAC -3'                                                 |
|                     | Common Reverse primer for <i>MuRF1a</i> | R: 5' - GAATCTCGAGTGCTGAGGTAGAGTC -3'                                                   |
| Morpholino          | <i>MuRF1a</i>                           | 5'-TTTGACCCGTTTGGATGTCCATTGC-3'                                                         |
|                     | <i>MuRF1b</i>                           | 5'-AAGAGGCAGTTCGCTGAATGTCCAT-3'                                                         |

\*Restriction enzyme sites were indicated by underlines.
